# Supplementary material for: Careful with That Axe, Gene, Genome Perturbation after a PEG-Mediated Protoplast Transformation in Fusarium verticillioides
Source: Toxins (Basel). 2017 May 31;9(6):183. doi: 10.3390/toxins9060183 (PMC5488033; doi:10.3390/toxins9060183)
Supplement: Supplementary file 1 [file toxins-09-00183-s001.pdf]

# Supplementary Materials: Careful with That Axe, Gene. Genome Perturbation after a PEG-Mediated Protoplasts Transformation in *Fusarium verticillioides*

Valeria Scala, Alessandro Grottoli, Riccardo Aiese Cigliano, Irantzu Anzar, Marzia Beccaccioli, Corrado Fanelli, Chiara Dall'Asta, Paola Battilani, Massimo Reverberi and Walter Sanseverino

**Table S1.** Phenological and physiological characterization of FvHph<sup>+</sup> strain in comparison with WT strain, Fv10027\_t1.

| strains            | Dry Weight (mg) |         | Spores/mL              | Fumonisin  |
|--------------------|-----------------|---------|------------------------|------------|
|                    | 2 dai           | 5 dai   | 5 dai                  | 5 dai      |
| Fv10027_t1         | 153 ± 4         | 234 ± 9 | 6.73 × 10 <sup>6</sup> | 47.2 ± 1.2 |
| FvHph <sup>+</sup> | 118 ± 2         | 160 ± 0 | 6.81 × 10 <sup>6</sup> | 60.3 ± 2.2 |

**Table S2.** List of primers used for cDNA amplification.

| Gene        | T. Annealing (°C) | Sequence                |
|-------------|-------------------|-------------------------|
| FVEG_13121  | FW                | TGGTTGATGCGAAGACCCCTC   |
|             | REV               | CTCCACGTTCTCGATGTGCT    |
| FVEG_13122  | FW                | GGTCCCACCAACAATCCCTT    |
|             | REV               | TTGTGCGCTGCCTTTACAGT    |
| FVEG_13123  | FW                | GTAAGTACTGGTTGTGCCGA    |
|             | REV               | ATTGTTCCGTCGTTGCTTGC    |
| FVEG_07317  | FW                | CGTAGAAGTGGCGAGCATGA    |
|             | REV               | AACCATGATTCGAGCAGGCA    |
| FVEG_07318  | FW                | TCCCATGCTGTTCAACCCTC    |
|             | REV               | AACACCAGCCATGATGTCGT    |
| FVEG_03821  | FW                | CAGTAACCACGACGACCCAA    |
|             | REV               | CGAGAACTTCCCGAACGGA     |
| FVEG_03822  | FW                | GGCTCCATCGTCATCTACCG    |
|             | REV               | CAGCGTTCATCATCTTGGCG    |
| β-TUB FW 65 | FW                | CTCTGCTCATTTCGAAGATCCG  |
|             | REV               | GTAGTTGAGGTCACCGTAGGAGG |

**Table S3.** Number of reads of the samples (Fv10027\_t0, Fv10027\_t1, FvHph<sup>+</sup>, ΔFv\_lds1D and ΔFv\_lds1T) obtained on the Illumina HiSeq platform, before and after the trimming.

| Before Trimming |            |            |                    |           |            |
|-----------------|------------|------------|--------------------|-----------|------------|
|                 | Fv10027_t0 | Fv10027_t1 | FvHph <sup>+</sup> | ΔFv_lds1D | ΔFv_lds1T  |
| Reads           | 4718,572   | 3,473,791  | 9,385,919          | 7,028,131 | 11,346,389 |
| Length          | 100        | 100        | 150                | 100       | 100        |
| After Trimming  |            |            |                    |           |            |
| Reads           | 3,377,271  | 2,228,758  | 6,369,195          | 6,264,405 | 10,125,903 |
| Length          | 35–90      | 35–90      | 35–140             | 35–90     | 35–90      |
| Discard         | 28.43%     | 35.84%     | 32.14%             | 10.87%    | 10.76%     |

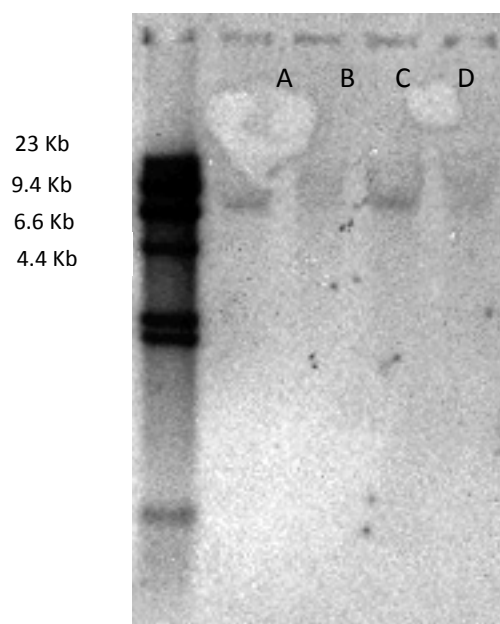

**Figure S1.** Characterization of the genomic organization of Hph cassette in  $\Delta Fv\_lds1D$  (10  $\mu$ g genomic DNA; (A) and (5  $\mu$ g genomic DNA; (B), and  $\Delta Fv\_lds1T$  (10  $\mu$ g genomic DNA; (C) and (5  $\mu$ g genomic DNA; (D). Southern Blot hybridization of KpnI-restricted genomic DNA was carried out using PCR digoxigenin (DIG)-labelled fragments by using primers Hph\_pAN7.1\_For (5'-AACTGTGATGGACGACACCG) and Hph\_pAN7.1\_Rev (5'-GATTTGTGTACGCCCGACAG). Hph probe was hybridized at 50 °C. Molecular weight DNA marker: DIG-labeled  $\lambda$ hindIII.

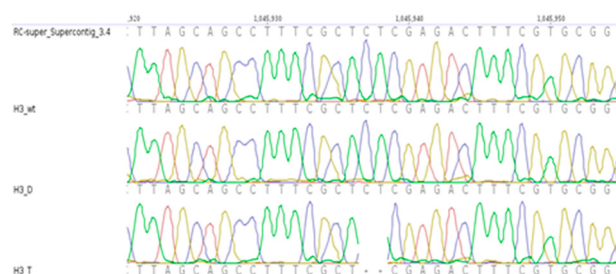

A

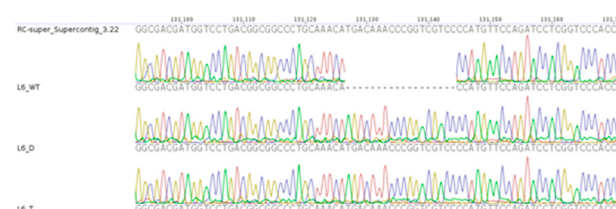

B

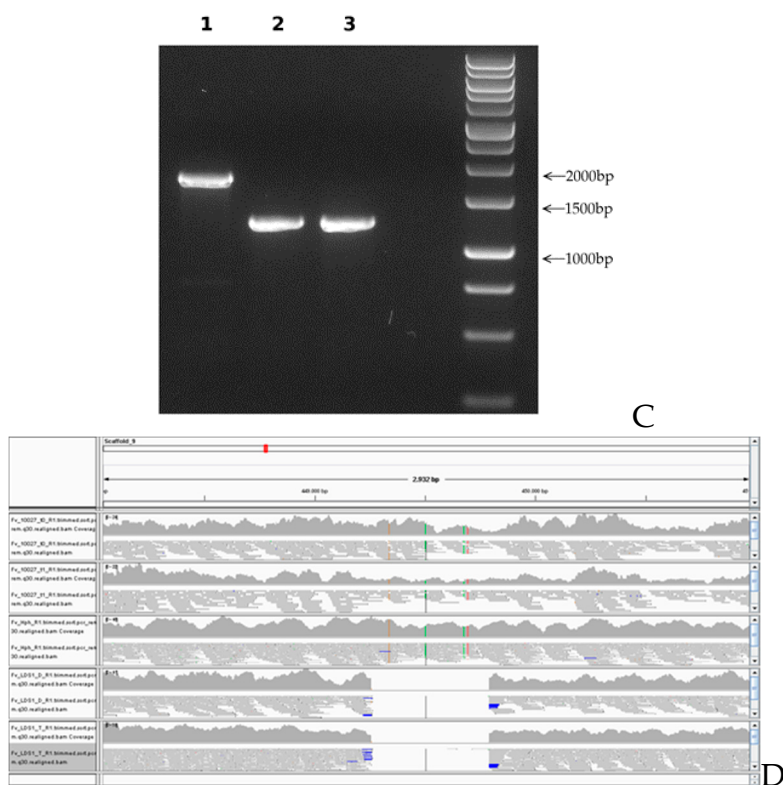

**Figure S2.** Validation of NGS information by standard procedures. A) Sanger sequencing of DIP1 variant; B) Sanger sequencing of DIP4 variant; C) Sanger sequencing of SNP5 variant; SV-1 validation by end-point PCR (lane1 Fv10027\_t1, lane2  $\Delta$ Fv\_lds1D and lane 3  $\Delta$ Fv\_lds1T); D) The Integrative Genomics Viewer (IGV) of the entire samples set (from 1<sup>st</sup> row: Fv10027\_t0, Fv10027\_t1, FvHph<sup>+</sup>  $\Delta$ Fv\_lds1D and  $\Delta$ Fv\_lds1T) showing the 535bp SV, in the position “Scaffold\_9:449256”.

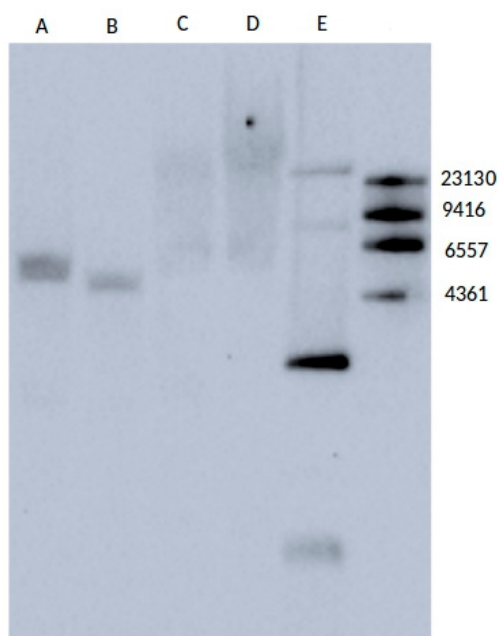

**Figure S3.** Characterization of the genomic organization of *Hph* cassette in FvHph<sup>+</sup> (A,B), Fv10027\_t1 (C,D), positive control (pAN 7.1::Hph) (E). Southern Blot hybridization of *Kpn*I-restricted genomic DNA was carried out using PCR digoxigenin (DIG)-labelled fragments by using primers Hph\_pAN7.1\_For (5'-AACTGTGATGGACGACACCG) and Hph\_pAN7.1\_Rev (5'-GATTTGTGTACGCCCGACAG). *Hph* probe was hybridized at 50 °C.
